1 Solo acylhomoserine lactone synthase from predatory myxobacterium suggests  
2 beneficial participation in interspecies cross talk

3

4 Hanan Albatineh<sup>a</sup>, Maya Duke<sup>a</sup>, Sandeep K. Misra<sup>a</sup>, Joshua S. Sharp<sup>a</sup>, and D. Cole  
5 Stevens<sup>a,#</sup>

6

7 Department of BioMolecular Sciences, University of Mississippi, University, MS, USA<sup>a</sup>

8

9 #Address correspondence to D. Cole Stevens, [stevens@olemiss.edu](mailto:stevens@olemiss.edu).

10

1 **Abstract:** The prototypical intraspecies quorum signaling systems mediated by  
2 acylhomoserine lactones are abundant in proteobacteria, and considerable efforts have  
3 provided insight into the regulated physiological features impacted by such systems.  
4 However, the high occurrence of orphaned AHL receptors present in bacterial species  
5 that do not produce cognate AHL signals suggests the involvement of AHL signals in  
6 interspecies interactions within polymicrobial communities. The specific benefits of these  
7 interactions are mostly unknown. Considered a key taxon in microbial communities,  
8 myxobacteria exist as coordinated swarms that utilize an excreted combination of lytic  
9 enzymes and specialized metabolites to facilitate predation of numerous microbial phyla.  
10 Of all the biosynthetic gene clusters associated with myxobacteria deposited in the  
11 antiSMASH database, only one putative acylhomoserine lactone synthase, *agpl*, was  
12 observed in genome data from the myxobacterium *Archangium gephyra*. Without a  
13 cognate AHL receptor, we consider Agpl an orphaned AHL synthase. Herein we report  
14 the bioinformatic assessment of Agpl and discovery of a second myxobacterial AHL  
15 synthase from *Vitiosangium* sp. strain GDMCC 1.1324. Heterologous expression of each  
16 synthase in *Escherichia coli* provided detectible quantities of 3 AHL signals including 2  
17 known AHLs, C8-AHL and C9-AHL. The functional, orphaned AHL synthase, Agpl, from  
18 the predatory myxobacterium *A. gephyra* provides unique support for beneficial  
19 interspecies crosstalk within polymicrobial communities.

20 **Importance:** The presence of orphaned quorum signal receptors and associated  
21 recognition and response to acylhomoserine lactone quorum signals provides evidence  
22 for small molecule-mediated interspecies interactions about microbial communities. A  
23 solo signal synthase from a predatory myxobacterium provides an alternative perspective

- 1 on the evolution and benefits of quorum signaling systems within these communities.
- 2 Ultimately our results support and supplement the hypothetical benefits of interspecies
- 3 cross talk within diverse microbial communities.

1 Ubiquitous throughout soils and marine sediments, bacteriovorous myxobacteria utilize  
2 cooperative features to facilitate uniquely social lifestyles and exhibit organized predation  
3 of microbial prey (1-3). Often attributed to their predatory capabilities, an extraordinary  
4 number of biologically active specialized metabolites have been discovered from  
5 myxobacteria (4-8). Interest in this chemical space and the therapeutic potential  
6 associated with each elucidated natural product has motivated significant efforts towards  
7 continued discovery. A recent survey of the unexplored, observable biosynthetic space  
8 from myxobacteria included in the antiSMASH database determined that the potential for  
9 such discovery from cultivable myxobacteria remains high (9-12). An oddity reported by  
10 this survey was the presence of a solo acylhomoserine lactone (AHL) synthase within the  
11 genome of the myxobacterium *Archangium gephyra* (9, 13, 14). Considered the  
12 prototypical class of quorum signals, AHL quorum signaling (QS) systems are abundant  
13 throughout the proteobacteria at large (15). While a recent assessment of AHL-  
14 associated QS receptors included within or nearby specialized metabolite biosynthetic  
15 gene clusters (BGCs) reported the presence of a putative AHL receptor from the marine  
16 myxobacterium *Haliangium ochraceum* DSM 14365, myxobacteria are not known to  
17 participate in AHL-mediated quorum signaling, and no AHL quorum signals have been  
18 reported from myxobacteria (16). Intriguingly, the model myxobacterium *Myxococcus*  
19 *xanthus* demonstrates enhanced predatory features when exposed to a variety of  
20 exogenous AHLs despite having no obvious AHL receptor within its genome (17). This  
21 phenomenon, often referred to as “eavesdropping,” has become a generally accepted  
22 cornerstone in hypotheses surrounding interspecies cross talk within polymicrobial  
23 communities, and the presence of solo or orphan AHL receptors from species that do not

1 produce AHL signals supports such communication (17-24). However, *A. gephyra* does  
2 not appear to harbor a cognate AHL receptor suggesting an input-driven participation in  
3 such cross talk unique from eavesdropping. Considering the abundance of AHL QS  
4 systems throughout proteobacteria other than myxobacteria, the uniqueness of this AHL  
5 synthase from *A. gephyra*, and the generalist diet of predatory myxobacteria that includes  
6 large swaths of AHL signaling proteobacteria, we hypothesize this AHL synthase was  
7 acquired horizontally (3, 25-27). Conversely, the benefit AHL production might provide a  
8 predatory myxobacterium remains non-obvious. Herein we report bioinformatic analysis,  
9 functional assessment, and heterologous expression of the myxobacterial AHL synthase  
10 Agpl.

## 11 **Results**

### 12 **Agpl is highly homologous to functional AHL synthases.**

13 Located in the 20.6kb BGC referenced as cluster 33 from *A. gephyra* (NZ\_CP011509)  
14 deposited in the antiSMASH database (version 4.2.1) the 210aa gene product, Agpl  
15 (WP\_047862734.1), is annotated as a putative autoinducer synthesis protein  
16 homologous to the GNAT family *N*-acetyltransferase, LuxI class of AHL synthases (Figure  
17 1) (10, 11, 18). None of the other annotated features proximal to *agpl* are obviously  
18 associated with AHL biosynthesis or chemical modifications. Assessment of highly  
19 homologous AHL synthases provided a second putative AHL synthase within the genome  
20 of the myxobacterium *Vitiosangium* sp. GDMCC 1.1324, deemed VitI  
21 (WP\_108069305.1), with 98% coverage and 68.12% identity when comparing amino acid  
22 sequence data with Agpl (28). The absence of genome data for *V.* sp. in version 4.2.1 of  
23 the antiSMASH database explains the omission of this putative AHL synthase from our

1 previous survey of myxobacterial biosynthetic space. The next highest scoring sequence  
2 from this analysis a GNAT family *N*-acetyltransferase (WP\_055459978.1) from  
3 *Chelatococcus sambhunathii* has 96% coverage and 56.44% identity with Agpl (29, 30).  
4 Alignment and phylogenetic analysis of Agpl and Vitl against an assortment of 17 AHL  
5 synthases experimentally validated to produce AHL QS molecules, suggests common  
6 ancestry with the LuxI, LasI, and TraI AHL synthases from *Aliivibrio fischeri*,  
7 *Pseudomonas aeruginosa*, and *Rhizobium radiobacter* thus supporting our hypothesis  
8 that Agpl was horizontally acquired (Figure 2) (31-42). Utilizing the genomic enzymology  
9 web tool EFI-EST developed by the Enzyme Function Initiative (EFI) to construct a  
10 sequence similarity network (SSN) that included 1,001 homologous entities as nodes and  
11 124,346 edges, both Agpl and Vitl are included in the central cluster family that contains  
12 the vast majority of homologous AHL synthases from proteobacteria (Figure 3) (43). From  
13 these data we conclude that both Agpl and Vitl are likely AHL synthases as originally  
14 predicted by antiSMASH analysis. We also suggest that the shared ancestry observed  
15 from phylogenetic analysis and general absence of such synthases from other  
16 myxobacterial phyla supports our hypothesis that these synthases were horizontally  
17 acquired.

### 18 **Absence of a cognate AHL receptor in the genome of *A. gephyra*.**

19 While no obvious AHL-binding LuxR homolog was identified in the chromosome of *A.*  
20 *gephyra*, we sought to determine the presence of any potential AHL-binding domain using  
21 the conserved sequence for autoinducer binding domains (PF03472). Utilizing the blastp  
22 suite at NCBI, we assessed all 3,014 domains within the pfam database classified as  
23 autoinducer binding domains for homology against the deposited genome of *A. gephyra*

1 (14, 44). No features within the proteome of *A. gephyra* were sufficiently homologous to  
2 be considered an autoinducer binding. We next queried the associated Hidden Markov  
3 Model (HMM) associated with autoinducer binding domains deposited in Pfam against  
4 the proteome of *A. gephyra* using HMMSEARCH (supplemental data)(45, 46). The most  
5 significant hit (E-value 0.0015) a PAS domain S-box-containing protein also annotated as  
6 a GAF-domain-containing protein (WP\_053066299.1) does not include significant  
7 sequence homology with LuxR-type, AHL receptors. Interestingly, similar analysis of *V.*  
8 sp. GDMCC 1.1324 provided a highly homologous LuxR-type receptor  
9 (WP\_108076247.1). While the AHL receptor identified in the genome of *V.* sp. is not  
10 clustered near *vitI* as is typical of LuxI-LuxR type synthase-receptor pairs, we cannot  
11 assume both are unpaired orphans and instead consider VitI might not be a truly solo  
12 AHL synthase. From these data we determined Agpl to be an orphaned AHL synthase  
13 without any cognate AHL receptor present in the genome of *A. gephyra*.

#### 14 ***A. gephyra* does not produce AHLs during axenic cultivation.**

15 Cultivation of *A. gephyra* on VY/2 agar plates at 30°C for 21 days provided fully  
16 developed, wispy myxobacterial swarms encompassing the entirety of the plate surface.  
17 Homogenized agar and cellular contents were extracted using traditional organic phase  
18 techniques to provide extracts for LC-MS/MS analysis. The resulting datasets from LC-  
19 MS/MS analysis of *A. gephyra* extracts were analyzed against datasets generated from  
20 analytical standards for a variety of AHLs including C6-AHL, 3-oxo-C6-AHL, C8-AHL, and  
21 C11-AHL to determine the presence of any produced AHL-like metabolites. Data from  
22 resulting mass spectra were scrutinized using the Global Natural Products Social  
23 Molecular Networking (GNPS) platform to generate molecular networks depicting

1 similarities in detected metabolite scaffolds inferred from ionized fragment commonalities  
2 (47). No metabolites that included the diagnostic AHL-associated fragments at 102.0547  
3 m/z and 74.0599 m/z associated with the core homoserine lactone moiety were detected  
4 in extracts from *A. gephyra* (48, 49). This data supports any one of the following  
5 conclusions *A. gephyra* does not produce AHL-like metabolites when grown axenically  
6 but may be active under other growth conditions; metabolites produced by Agpl do not  
7 possess structural similarity with typical AHL metabolites; or Agpl is simply nonfunctional.

### 8 **Heterologous expression of Agpl confirms functional production of AHLs.**

9 To explore the functionality of both Agpl and Vitl and assumed biosynthesis of AHL-like  
10 metabolites, inducible codon-optimized constructs of *agpl* and *vitl* included in replicating  
11 plasmids suitable for expression in *Escherichia coli* were purchased. Heterologous  
12 expression of Agpl and Vitl and subsequent extraction, LC-MS/MS analysis, and  
13 evaluation of molecular networks rendered by GNPS as previously described, provided a  
14 cluster family including 2 of 3 total nodes identified as C8-AHL (228.159 m/z) and C9-  
15 AHL (242.174 m/z) from internal GNPS public datasets as well as a third AHL metabolite  
16 detected at 226.144 m/z (Figure 4) (47). This cluster family was identical in both  
17 heterologous expression experiments suggesting that Agpl and Vitl produce the same 3  
18 AHL metabolites with similar detected intensities for each AHL. Both C8-AHL and C9-  
19 AHL were confirmed to be present in Agpl and Vitl extracts using analytical standards.  
20 Based on associated intensities, C8-AHL was the most abundant and the metabolite  
21 detected at 226.144 m/z was the least abundant AHL. No AHL-like entities were detected  
22 in control extracts from *E. coli* containing an empty pET28b expression plasmid. From the  
23 mass difference between C8-AHL and the unknown AHL detected at 226.144 m/z (2.015



1 Da measured vs. 2.01565 theoretical), as well as shared fragmentation patterns, we  
2 determined the metabolite detected at 226.144 m/z was likely an unsaturated analog of  
3 C8-AHL (Figure 5). From these experiments we determined that both Agpl and Vitl are  
4 functional AHL synthases capable of producing the previously characterized AHLs C8-  
5 AHL and C9-AHL. These results also suggest *A. gephyra* produces these AHLs and likely  
6 requires environmental cues or specific nutrients not present during our axenic cultivation  
7 conditions.

## 8 **Discussion**

9 Ultimately we conclude that the myxobacteria *A. gephyra* and *V. sp.* possess functional  
10 AHL synthases that produce the AHL signals C8-AHL and C9-AHL when heterologously  
11 expressed in *E. coli*. Considering the strong precedent for heterologous expression of  
12 AHL synthases in *E. coli* to determine produced AHL metabolites, we suggest that both  
13 *A. gephyra* and *V. sp.* capably produce one or all of the observed AHL signals and that  
14 Agpl is merely silent or cryptic during axenic cultivation of *A. gephyra* (50-55). However,  
15 we should also consider that these synthases could instead utilize an acyl-ACP precursor  
16 not available to the heterologous *E. coli* host, and we are actively exploring cultivation  
17 conditions that might induce native AHL production from *A. gephyra* (54, 55). While  
18 numerous bacteria have been observed to possess orphaned LuxR-type AHL receptors,  
19 production of AHL metabolites from a solo AHL synthase without any cognate AHL  
20 receptor with homology to LuxR also present in the genome of *A. gephyra* is the first to  
21 be reported (19, 21, 23, 56). Although a functional orphaned LuxI-type synthase capable  
22 of producing AHLs has been reported from the sponge symbiont *Ruegeria sp.* KLH11,  
23 the strain also harbors 2 pairs of clustered LuxI/LuxR homologues (23, 57). We suggest

1 that production of quorum signals by myxobacteria supports the theoretical benefits of  
2 interspecies cross talk similar to functional, solo AHL receptors (21, 58-60). We also  
3 propose that the more typical abundance of orphan AHL receptors reported from a variety  
4 of bacterial species compared to the seemingly exceptional solo AHL synthase reported  
5 here might correlate with the rarity of bacteriovorus micropredators (19, 27). The absence  
6 of any AHL metabolites during axenic cultivation of *A. gephyra* suggests an unknown  
7 regulatory mechanism independent of the typical LuxR receptor to be involved. However,  
8 previously reported eavesdropping by *M. xanthus* and response to exogenous AHLs  
9 despite the absence of any AHL receptor with homology to LuxR suggests myxobacteria  
10 may possess an undiscovered, alternative means of AHL detection (17). While the benefit  
11 afforded predatory myxobacteria remains unclear, production of AHL signals known to  
12 regulate QS-associated physiological functions such as biofilm formation, specialized  
13 metabolism, and motility offers some insight (15). Predatory disruption of any one of these  
14 functions would likely improve predation of quorum signaling prey. We consider these  
15 observations provide a unique perspective and support the continued investigation of  
16 small molecule interactions that contribute to microbial community structures and trophic  
17 levels.

## 18 **Materials and Methods**

19 **Cultivation of *A. gephyra*.** *Archangium gephyra* (DSM 2261) initially obtained from  
20 German Collection of Microorganisms in Braunschweig was grown on VY/2 agar (5 g/L  
21 baker's yeast, 1.36 g/L CaCl<sub>2</sub>, 0.5 mg/L vitamin B<sub>12</sub>, 15 g/L agar, pH 7.2).

22 **Bioinformatic assessment of Agpl.** The amino acid sequence for Agpl  
23 (WP\_047862734.1) was submitted for blastp analysis and EFI-EST analysis

1 (<https://efi.igb.illinois.edu/efi-est/>) using the default settings. Results from EFI-EST  
2 analysis were visualized using Cytoscape and are provided as supplemental data.  
3 Alignments from ClustalW and minimum evolution phylogenetic trees were rendered  
4 using MEGA7 (61, 62).

5 **Autoinducer binding site search.** All 3,014 domains annotated as autoinducer binding  
6 domains (PF03472) deposited in Pfam were subjected to blastp analysis against the *A.*  
7 *gephyra* genome (NZ\_CP011509.1). For HMMSEARCH analysis, the raw HMM for  
8 autoinducer binding domains was downloaded from Pfam (PF03472) and utilized as input  
9 for profile-HMM vs protein sequence database via HMMSEARCH with the taxonomy  
10 restrictions set to limit analysis to *A. gephyra* or *V. sp.* Results from this analysis are  
11 provided as supplemental data.

12 **Heterologous expression of Agpl and Vitl in *E. coli*.** Constructs of Agpl and Vitl codon  
13 optimized for expression in *E. coli* situated in pET28b were purchased from Genscript  
14 (Piscataway, NJ). Sequence data for these constructs are provided as supplemental data.  
15 Heterologous host *E. coli* K207-3 was grown at 37°C in LB broth supplemented with  
16 50µg/mL kanamycin, induced with 1µM IPTG at OD<sub>600</sub>=0.6, and grown overnight at 14°C  
17 to facilitate heterologous protein expression.

18 **Metabolite extraction and analysis.** After 21 days of cultivation, *A. gephyra* plates were  
19 manually diced and extracted with excess EtOAc. Pooled EtOAc was filtered and dried *in*  
20 *vacuo* to provide crude extracts for LC-MS/MS analysis. Extracts from heterologous  
21 strains of *E. coli* were generated by Amberlite XAD-16 absorber resin facilitated extraction  
22 of clarified culture broths following cell lysis. LC-MS/MS analysis of the extracted samples  
23 was performed on an Orbitrap Fusion instrument (Thermo Scientific, San Jose, CA)

1 controlled with Xcalibur version 2.0.7 and coupled to a Dionex Ultimate 3000 nanoUHPLC  
2 system. Samples were loaded onto a PepMap 100 C18 column (0.3 mm × 150 mm, 2  
3 μm, Thermo Fisher Scientific). Separation of the samples was performed using mobile  
4 phase A (0.1% formic acid in water) and mobile phase B (0.1% formic acid in acetonitrile)  
5 at a rate of 6 μL/min. The samples were eluted with a gradient consisting of 5 to 60%  
6 solvent B over 15 min, ramped to 95 % B over 2 min, held for 3 min, and then returned to  
7 5% B over 3 min and held for 8 min. All data were acquired in positive ion mode. Collision-  
8 induced dissociation (CID) was used to fragment molecules, with an isolation width of 3  
9 m/z units. The spray voltage was set to 3600 volts, and the temperature of the heated  
10 capillary was set to 300 °C. In CID mode, full MS scans were acquired from m/z 150 to  
11 1200 followed by eight subsequent MS2 scans on the top eight most abundant peaks.  
12 The orbitrap resolution for both the MS1 and MS2 scans was 120000. The expected mass  
13 accuracy was <3 ppm.

14 **GNPS dataset.** Generated data were converted to .mzXML files using MS-Convert and  
15 mass spectrometry molecular networks were generated using the GNPS platform  
16 (<http://gnps.ucsd.edu>) (47). The corresponding Cytoscape file is provided as  
17 supplemental information. LC-MS/MS data for this analysis were also deposited in the  
18 MassIVE Public GNPS data set (MSV000084574).

### 19 **Acknowledgements.**

20 The authors appreciate funding and support from the National Institute of Allergy and  
21 Infectious Diseases (R15AI137996), Fulbright (H.A), and the University of Mississippi.

### 22 **References.**

23 1. Cao P, Dey A, Vassallo CN, Wall D. 2015. How Myxobacteria Cooperate. *J Mol Biol*  
24 427:3709-21.

- 1 2. Mohr KI. 2018. Diversity of Myxobacteria-We Only See the Tip of the Iceberg.  
2 Microorganisms 6.
- 3 3. Munoz-Dorado J, Marcos-Torres FJ, Garcia-Bravo E, Moraleda-Munoz A, Perez J. 2016.  
4 Myxobacteria: Moving, Killing, Feeding, and Surviving Together. *Front Microbiol* 7:781.
- 5 4. Bader CD, Panter F, Muller R. 2019. In depth natural product discovery - Myxobacterial  
6 strains that provided multiple secondary metabolites. *Biotechnol Adv*  
7 doi:10.1016/j.biotechadv.2019.107480:107480.
- 8 5. Baltz RH. 2017. Gifted microbes for genome mining and natural product discovery. *J Ind*  
9 *Microbiol Biotechnol* 44:573-588.
- 10 6. Herrmann J, Fayad AA, Muller R. 2017. Natural products from myxobacteria: novel  
11 metabolites and bioactivities. *Nat Prod Rep* 34:135-160.
- 12 7. Korp J, Vela Gurovic MS, Nett M. 2016. Antibiotics from predatory bacteria. *Beilstein J Org*  
13 *Chem* 12:594-607.
- 14 8. Landwehr W, Wolf C, Wink J. 2016. Actinobacteria and Myxobacteria-Two of the Most  
15 Important Bacterial Resources for Novel Antibiotics. *Curr Top Microbiol Immunol*  
16 398:273-302.
- 17 9. Gregory K, Salvador LA, Akbar S, Adaikpoh BI, Stevens DC. 2019. Survey of Biosynthetic  
18 Gene Clusters from Sequenced Myxobacteria Reveals Unexplored Biosynthetic Potential.  
19 *Microorganisms* 7.
- 20 10. Blin K, Medema MH, Kottmann R, Lee SY, Weber T. 2017. The antiSMASH database, a  
21 comprehensive database of microbial secondary metabolite biosynthetic gene clusters.  
22 *Nucleic Acids Res* 45:D555-D559.
- 23 11. Blin K, Pascal Andreu V, de Los Santos ELC, Del Carratore F, Lee SY, Medema MH, Weber  
24 T. 2019. The antiSMASH database version 2: a comprehensive resource on secondary  
25 metabolite biosynthetic gene clusters. *Nucleic Acids Res* 47:D625-D630.
- 26 12. Blin K, Shaw S, Steinke K, Villebro R, Ziemert N, Lee SY, Medema MH, Weber T. 2019.  
27 antiSMASH 5.0: updates to the secondary metabolite genome mining pipeline. *Nucleic*  
28 *Acids Res* 47:W81-W87.
- 29 13. Lang E, Schumann P, Tindall BJ, Mohr KI, Sproer C. 2015. Reclassification of *Angiococcus*  
30 *disciformis*, *Cystobacter minus* and *Cystobacter violaceus* as *Archangium disciforme*  
31 *comb. nov.*, *Archangium minus comb. nov.* and *Archangium violaceum comb. nov.*,  
32 unification of the families Archangiaceae and Cystobacteraceae, and emended  
33 descriptions of the families Myxococcaceae and Archangiaceae. *Int J Syst Evol Microbiol*  
34 65:4032-4042.
- 35 14. Sharma G, Subramanian S. 2017. Unravelling the Complete Genome of *Archangium*  
36 *gephyra* DSM 2261T and Evolutionary Insights into Myxobacterial Chitinases. *Genome*  
37 *Biol Evol* 9:1304-1311.
- 38 15. Papenfort K, Bassler BL. 2016. Quorum sensing signal-response systems in Gram-negative  
39 bacteria. *Nat Rev Microbiol* 14:576-88.
- 40 16. Brotherton CA, Medema MH, Greenberg EP. 2018. luxR Homolog-Linked Biosynthetic  
41 Gene Clusters in Proteobacteria. *mSystems* 3.
- 42 17. Lloyd DG, Whitworth DE. 2017. The Myxobacterium *Myxococcus xanthus* Can Sense and  
43 Respond to the Quorum Signals Secreted by Potential Prey Organisms. *Front Microbiol*  
44 8:439.

- 1 18. Schuster M, Sexton DJ, Diggle SP, Greenberg EP. 2013. Acyl-homoserine lactone quorum  
2 sensing: from evolution to application. *Annu Rev Microbiol* 67:43-63.
- 3 19. Subramoni S, Venturi V. 2009. LuxR-family 'solos': bachelor sensors/regulators of  
4 signalling molecules. *Microbiology* 155:1377-85.
- 5 20. Subramoni S, Venturi V. 2009. PpoR is a conserved unpaired LuxR solo of *Pseudomonas*  
6 *putida* which binds N-acyl homoserine lactones. *BMC Microbiol* 9:125.
- 7 21. Wellington S, Greenberg EP. 2019. Quorum Sensing Signal Selectivity and the Potential  
8 for Interspecies Cross Talk. *MBio* 10.
- 9 22. Whiteley M, Diggle SP, Greenberg EP. 2017. Progress in and promise of bacterial quorum  
10 sensing research. *Nature* 551:313-320.
- 11 23. Tobias NJ, Brehm J, Kresovic D, Brameyer S, Bode HB, Heermann R. 2019. New vocabulary  
12 for bacterial communication. *Chembiochem* doi:10.1002/cbic.201900580.
- 13 24. Hudaiberdiev S, Choudhary KS, Vera Alvarez R, Gelencser Z, Ligeti B, Lamba D, Pongor S.  
14 2015. Census of solo LuxR genes in prokaryotic genomes. *Front Cell Infect Microbiol* 5:20.
- 15 25. Mendes-Soares H, Velicer GJ. 2013. Decomposing predation: testing for parameters that  
16 correlate with predatory performance by a social bacterium. *Microb Ecol* 65:415-23.
- 17 26. Morgan AD, MacLean RC, Hillesland KL, Velicer GJ. 2010. Comparative analysis of  
18 myxococcus predation on soil bacteria. *Appl Environ Microbiol* 76:6920-7.
- 19 27. Perez J, Moraleda-Munoz A, Marcos-Torres FJ, Munoz-Dorado J. 2016. Bacterial  
20 predation: 75 years and counting! *Environ Microbiol* 18:766-79.
- 21 28. Awal RP, Garcia R, Gemperlein K, Wink J, Kunwar B, Parajuli N, Muller R. 2017.  
22 *Vitiosangium cumulatum* gen. nov., sp. nov. and *Vitiosangium subalbum* sp. nov., soil  
23 myxobacteria, and emended descriptions of the genera *Archangium* and *Angiococcus*,  
24 and of the family *Cystobacteraceae*. *Int J Syst Evol Microbiol* 67:1422-1430.
- 25 29. Badhai J, Whitman WB, Das SK. 2016. Draft Genome Sequence of *Chelatococcus*  
26 *sambhunathii* Strain HT4T (DSM 18167T) Isolated from a Hot Spring in India. *Genome*  
27 *Announc* 4.
- 28 30. Panday D, Das SK. 2010. *Chelatococcus sambhunathii* sp. nov., a moderately thermophilic  
29 alphaproteobacterium isolated from hot spring sediment. *Int J Syst Evol Microbiol* 60:861-  
30 5.
- 31 31. White CE, Winans SC. 2007. Cell-cell communication in the plant pathogen *Agrobacterium*  
32 *tumefaciens*. *Philos Trans R Soc Lond B Biol Sci* 362:1135-48.
- 33 32. Schaefer AL, Greenberg EP, Oliver CM, Oda Y, Huang JJ, Bittan-Banin G, Peres CM, Schmidt  
34 S, Juhaszova K, Sufrin JR, Harwood CS. 2008. A new class of homoserine lactone quorum-  
35 sensing signals. *Nature* 454:595-9.
- 36 33. Rasch M, Andersen JB, Nielsen KF, Flodgaard LR, Christensen H, Givskov M, Gram L. 2005.  
37 Involvement of bacterial quorum-sensing signals in spoilage of bean sprouts. *Appl Environ*  
38 *Microbiol* 71:3321-30.
- 39 34. Pearson JP, Gray KM, Passador L, Tucker KD, Eberhard A, Iglewski BH, Greenberg EP. 1994.  
40 Structure of the autoinducer required for expression of *Pseudomonas aeruginosa*  
41 virulence genes. *Proc Natl Acad Sci U S A* 91:197-201.
- 42 35. Parsek MR, Schaefer AL, Greenberg EP. 1997. Analysis of random and site-directed  
43 mutations in *rhII*, a *Pseudomonas aeruginosa* gene encoding an acylhomoserine lactone  
44 synthase. *Mol Microbiol* 26:301-10.

- 1 36. Nhu Lam M, Dudekula D, Durham B, Collingwood N, Brown EC, Nagarajan R. 2018. Insights  
2 into beta-ketoacyl-chain recognition for beta-ketoacyl-ACP utilizing AHL synthases. *Chem*  
3 *Commun (Camb)* 54:8838-8841.
- 4 37. Milton DL, Hardman A, Camara M, Chhabra SR, Bycroft BW, Stewart GS, Williams P. 1997.  
5 Quorum sensing in *Vibrio anguillarum*: characterization of the *vanI/vanR* locus and  
6 identification of the autoinducer N-(3-oxodecanoyl)-L-homoserine lactone. *J Bacteriol*  
7 179:3004-12.
- 8 38. Engebrecht J, Silverman M. 1984. Identification of genes and gene products necessary for  
9 bacterial bioluminescence. *Proc Natl Acad Sci U S A* 81:4154-8.
- 10 39. Eberl L, Winson MK, Sternberg C, Stewart GS, Christiansen G, Chhabra SR, Bycroft B,  
11 Williams P, Molin S, Givskov M. 1996. Involvement of N-acyl-L-homoserine lactone  
12 autoinducers in controlling the multicellular behaviour of *Serratia liquefaciens*. *Mol*  
13 *Microbiol* 20:127-36.
- 14 40. Dong SH, Frane ND, Christensen QH, Greenberg EP, Nagarajan R, Nair SK. 2017. Molecular  
15 basis for the substrate specificity of quorum signal synthases. *Proc Natl Acad Sci U S A*  
16 114:9092-9097.
- 17 41. Chakrabarti S, Sowdhamini R. 2003. Functional sites and evolutionary connections of  
18 acylhomoserine lactone synthases. *Protein Eng* 16:271-8.
- 19 42. Brader G, Sjoblom S, Hyytiainen H, Sims-Huopaniemi K, Palva ET. 2005. Altering substrate  
20 chain length specificity of an acylhomoserine lactone synthase in bacterial  
21 communication. *J Biol Chem* 280:10403-9.
- 22 43. Zallot R, Oberg N, Gerlt JA. 2019. The EFI Web Resource for Genomic Enzymology Tools:  
23 Leveraging Protein, Genome, and Metagenome Databases to Discover Novel Enzymes  
24 and Metabolic Pathways. *Biochemistry* 58:4169-4182.
- 25 44. El-Gebali S, Mistry J, Bateman A, Eddy SR, Luciani A, Potter SC, Qureshi M, Richardson LJ,  
26 Salazar GA, Smart A, Sonnhammer ELL, Hirsh L, Paladin L, Piovesan D, Tosatto SCE, Finn  
27 RD. 2019. The Pfam protein families database in 2019. *Nucleic Acids Res* 47:D427-D432.
- 28 45. Finn RD, Clements J, Eddy SR. 2011. HMMER web server: interactive sequence similarity  
29 searching. *Nucleic Acids Res* 39:W29-37.
- 30 46. Wheeler TJ, Eddy SR. 2013. nhmmer: DNA homology search with profile HMMs.  
31 *Bioinformatics* 29:2487-9.
- 32 47. Wang M, Carver JJ, Phelan VV, Sanchez LM, Garg N, Peng Y, Nguyen DD, Watrous J,  
33 Kapon CA, Luzzatto-Knaan T, Porto C, Bouslimani A, Melnik AV, Meehan MJ, Liu WT,  
34 Crusemann M, Boudreau PD, Esquenazi E, Sandoval-Calderon M, Kersten RD, Pace LA,  
35 Quinn RA, Duncan KR, Hsu CC, Floros DJ, Gavilan RG, Kleigrew K, Northen T, Dutton RJ,  
36 Parrot D, Carlson EE, Aigle B, Michelsen CF, Jelsbak L, Sohlenkamp C, Pevzner P, Edlund A,  
37 McLean J, Piel J, Murphy BT, Gerwick L, Liaw CC, Yang YL, Humpf HU, Maansson M, Keyzers  
38 RA, Sims AC, Johnson AR, Sidebottom AM, Sedio BE, et al. 2016. Sharing and community  
39 curation of mass spectrometry data with Global Natural Products Social Molecular  
40 Networking. *Nat Biotechnol* 34:828-837.
- 41 48. Patel NM, Moore JD, Blackwell HE, Amador-Noguez D. 2016. Identification of  
42 Unanticipated and Novel N-Acyl L-Homoserine Lactones (AHLs) Using a Sensitive Non-  
43 Targeted LC-MS/MS Method. *PLoS One* 11:e0163469.

- 1 49. Gould TA, Herman J, Krank J, Murphy RC, Churchill ME. 2006. Specificity of acyl-  
2 homoserine lactone synthases examined by mass spectrometry. *J Bacteriol* 188:773-83.
- 3 50. Zheng H, Zhong Z, Lai X, Chen WX, Li S, Zhu J. 2006. A LuxR/LuxI-type quorum-sensing  
4 system in a plant bacterium, *Mesorhizobium tianshanense*, controls symbiotic  
5 nodulation. *J Bacteriol* 188:1943-9.
- 6 51. Neumann A, Patzelt D, Wagner-Dobler I, Schulz S. 2013. Identification of new N-  
7 acylhomoserine lactone signalling compounds of *Dinoroseobacter shibae* DFL-12(T) by  
8 overexpression of luxI genes. *Chembiochem* 14:2355-61.
- 9 52. Dang HT, Komatsu S, Masuda H, Enomoto K. 2017. Characterization of LuxI and LuxR  
10 Protein Homologs of N-Acylhomoserine Lactone-Dependent Quorum Sensing System in  
11 *Pseudoalteromonas* sp. 520P1. *Mar Biotechnol (NY)* 19:1-10.
- 12 53. Britstein M, Devescovi G, Handley KM, Malik A, Haber M, Saurav K, Teta R, Costantino V,  
13 Burgsdorf I, Gilbert JA, Sher N, Venturi V, Steindler L. 2016. A New N-Acyl Homoserine  
14 Lactone Synthase in an Uncultured Symbiont of the Red Sea Sponge *Theonella swinhoei*.  
15 *Appl Environ Microbiol* 82:1274-1285.
- 16 54. Hoshino S, Onaka H, Abe I. 2019. Activation of silent biosynthetic pathways and discovery  
17 of novel secondary metabolites in actinomycetes by co-culture with mycolic acid-  
18 containing bacteria. *J Ind Microbiol Biotechnol* 46:363-374.
- 19 55. Mao D, Okada BK, Wu Y, Xu F, Seyedsayamdost MR. 2018. Recent advances in activating  
20 silent biosynthetic gene clusters in bacteria. *Curr Opin Microbiol* 45:156-163.
- 21 56. Chugani S, Greenberg EP. 2014. An evolving perspective on the *Pseudomonas aeruginosa*  
22 orphan quorum sensing regulator QscR. *Front Cell Infect Microbiol* 4:152.
- 23 57. Zan J, Choi O, Meharena H, Uhlson CL, Churchill ME, Hill RT, Fuqua C. 2015. A solo luxI-  
24 type gene directs acylhomoserine lactone synthesis and contributes to motility control in  
25 the marine sponge symbiont *Ruegeria* sp. KLH11. *Microbiology* 161:50-6.
- 26 58. Venturi V, Bertani I, Kerenyi A, Netotea S, Pongor S. 2010. Co-swarming and local collapse:  
27 quorum sensing conveys resilience to bacterial communities by localizing cheater  
28 mutants in *Pseudomonas aeruginosa*. *PLoS One* 5:e9998.
- 29 59. Noel JT, Joy J, Smith JN, Fatica M, Schneider KR, Ahmer BM, Teplitski M. 2010. *Salmonella*  
30 *SdiA* recognizes N-acyl homoserine lactone signals from *Pectobacterium carotovorum* in  
31 vitro, but not in a bacterial soft rot. *Mol Plant Microbe Interact* 23:273-82.
- 32 60. McDougald D, Srinivasan S, Rice SA, Kjelleberg S. 2003. Signal-mediated cross-talk  
33 regulates stress adaptation in *Vibrio* species. *Microbiology* 149:1923-33.
- 34 61. Sievers F, Higgins DG. 2018. Clustal Omega for making accurate alignments of many  
35 protein sequences. *Protein Sci* 27:135-145.
- 36 62. Kumar S, Stecher G, Tamura K. 2016. MEGA7: Molecular Evolutionary Genetics Analysis  
37 Version 7.0 for Bigger Datasets. *Mol Biol Evol* 33:1870-4.
- 38



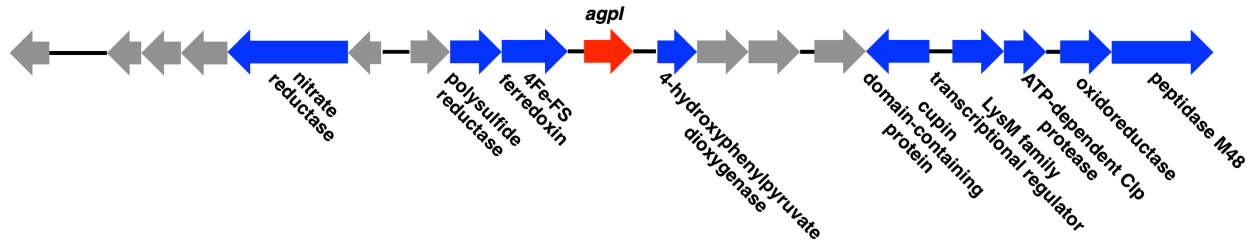

1

2 **Figure 1:** Cluster 33 from *A. gephyra* deposited in the antiSMASH database which  
3 includes the putative AHL synthase, *agpl*. All annotations included in the antiSMASH  
4 database provided and all hypothetical features are in grey (10, 11).

5

1

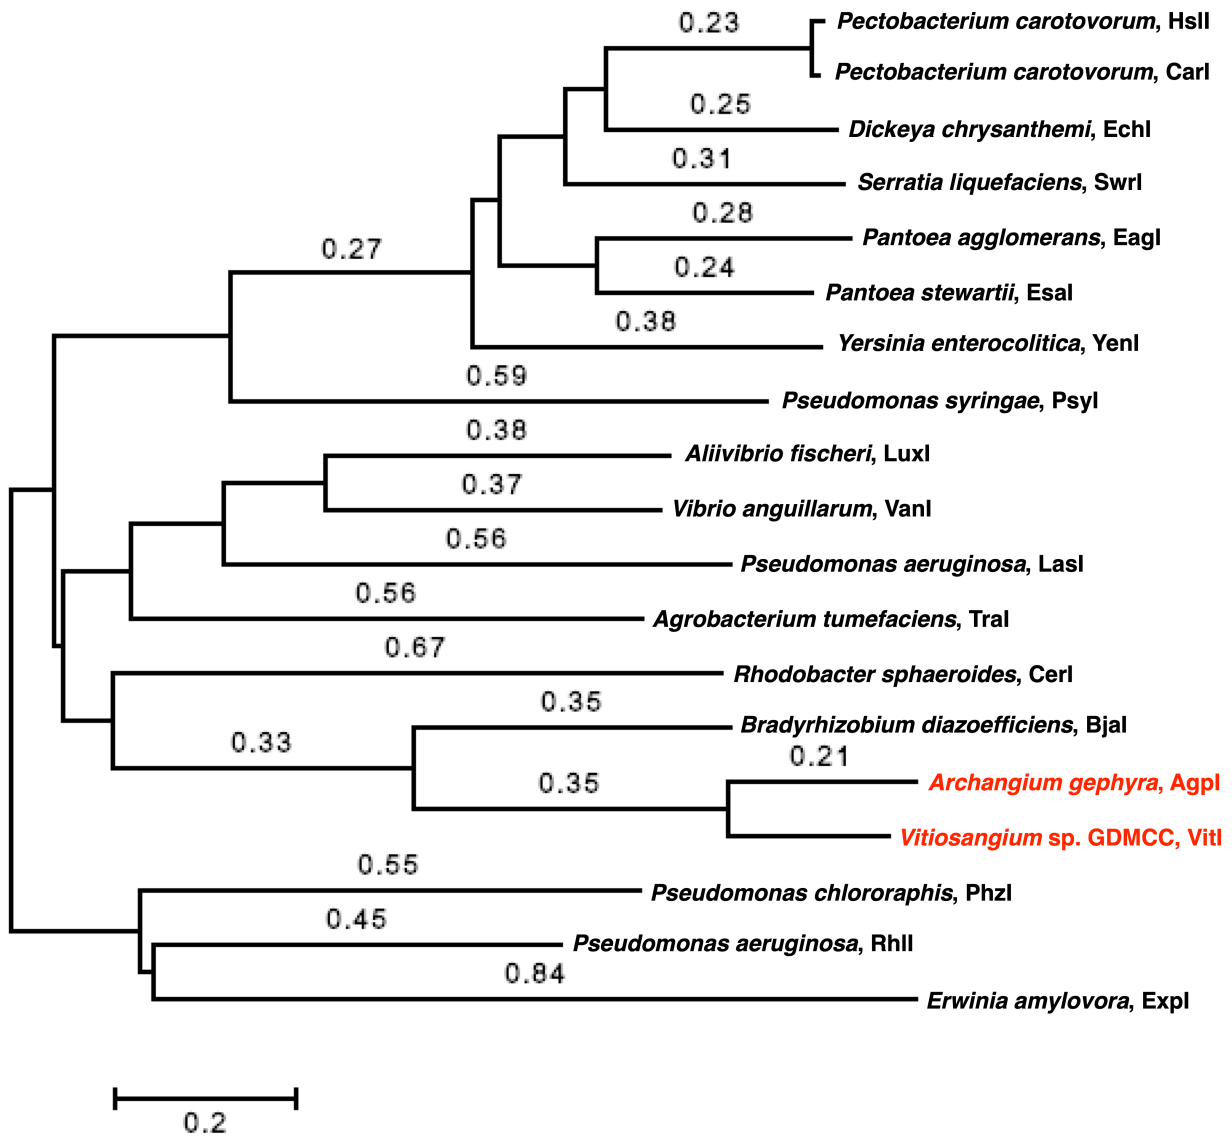

- 2 **Figure 2:** Minimum Evolution tree including Agpl and Vitl rendered in MEGA7 using
- 3 ClustalW aligned with AHL synthases experimentally confirmed to produce AHLs (62).
- 4 Branch lengths  $\leq 0.2$  not depicted.

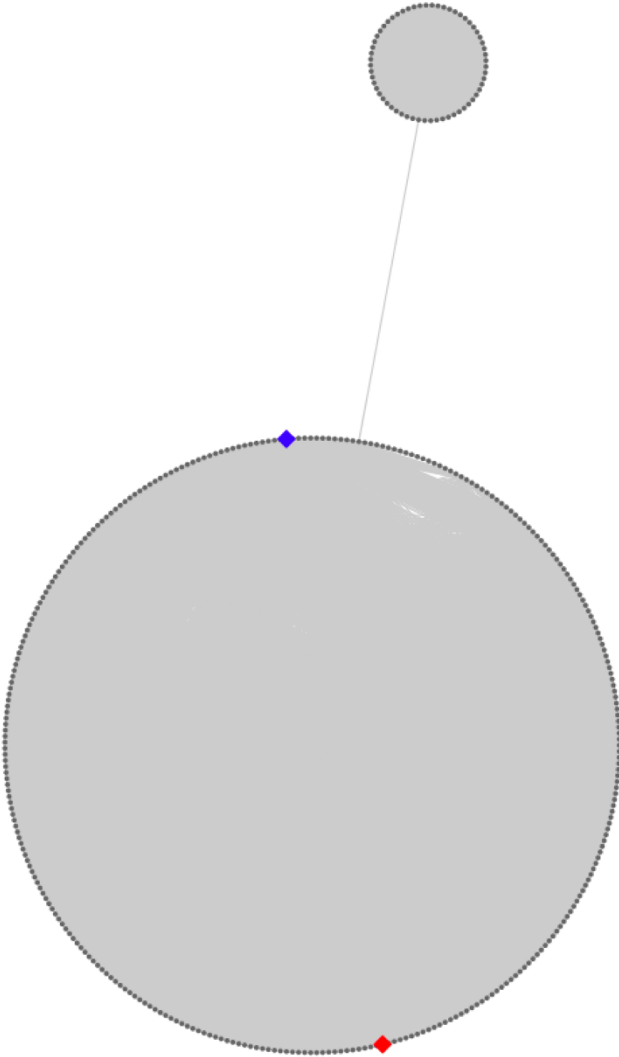

1

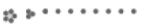

2

**Figure 3:** Sequence similarity network rendered by EFI-EST analysis of Agpl amino acid

3

sequence data with Agpl (red diamond) and Vitl (blue diamond) indicated (43). To reduce

4

complexity all nodes with  $\geq 90\%$  sequence similarity are represented as an individual

5

aggregate node.

6

1

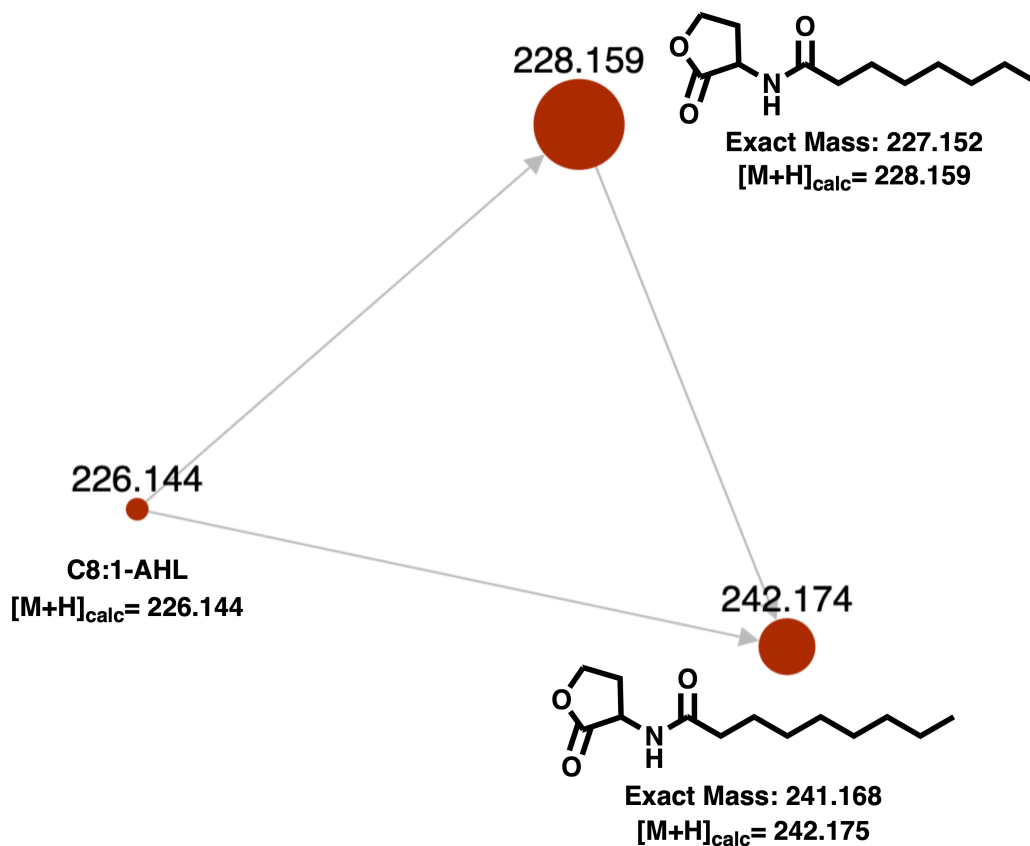

14 **Figure 4:** Molecular family from the molecular network of LC-MS/MS datasets from  
15 extracts of heterologous *E. coli* expressing AgpI rendered by GNPS (47). Detected m/z  
16 values from raw data positioned over each node with node diameter depicting associated  
17 intensities for each AHL.

1

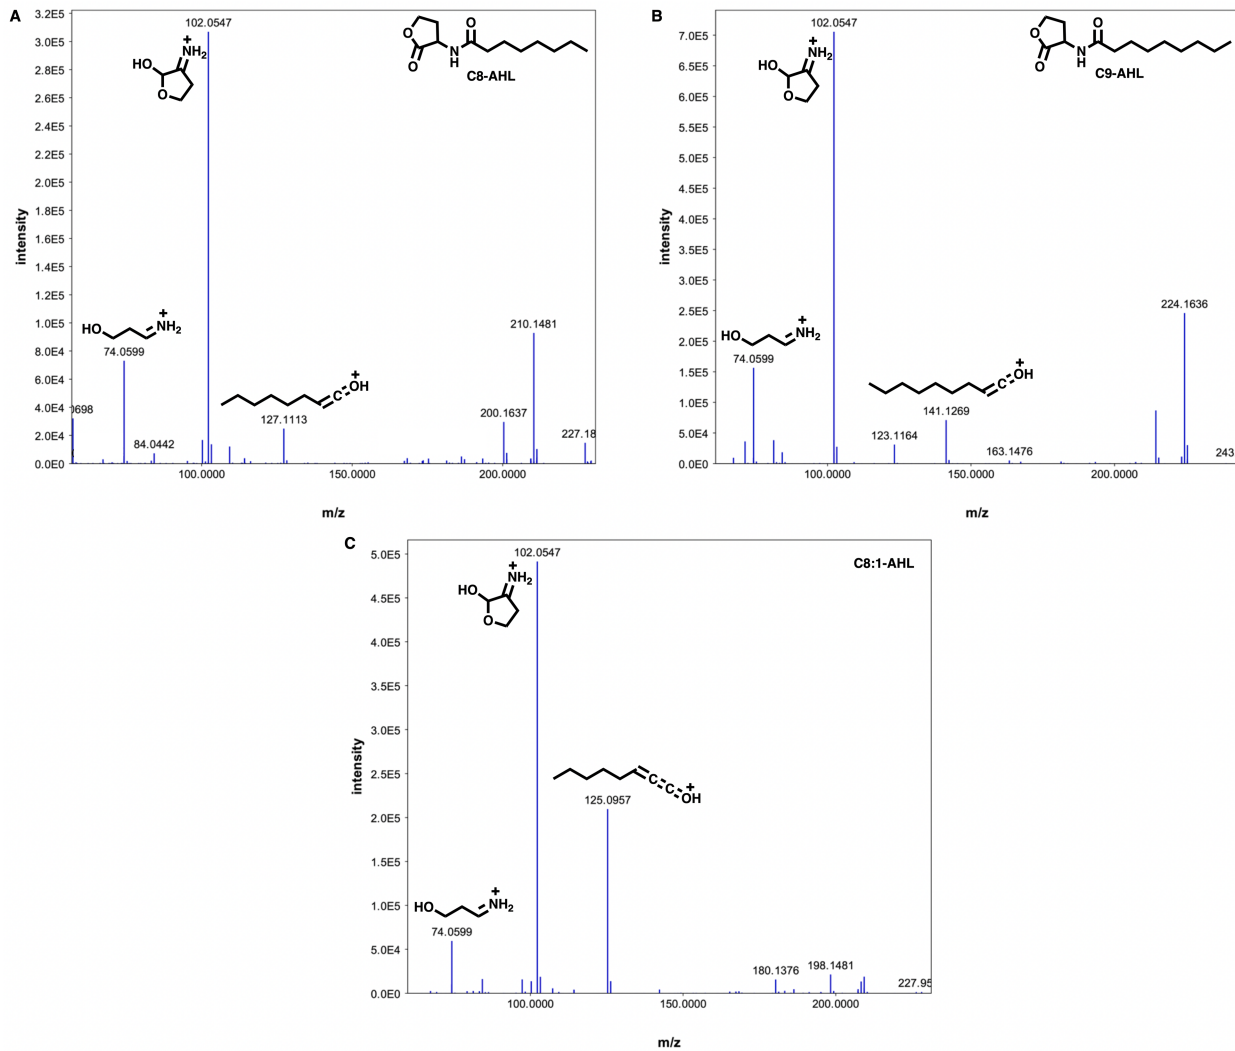

2 **Figure 5:** MS/MS fragmentation spectra with diagnostic fragments indicated for each AHL  
3 detected in extracts from heterologous *E. coli* expressing Agpl.

4
